# Supplementary material
Source: PubMed Central journal article supplement (PMC6563591)
Supplement: jamainternmed-179-1061-s001.pdf [file jamainternmed-179-1061-s001.pdf]

## Supplementary Online Content

Park Y-MM, White AJ, Jackson CL, Weinberg CR, Sandler DP. Association of exposure to artificial light at night while sleeping with risk of obesity in women. *JAMA Intern Med*. Published online June 10, 2019. doi:10.1001/jamainternmed.2019.0571

**eTable 1.** Other Baseline Sleep Characteristics by Exposure to ALAN While Sleeping

**eTable 2.** Association Between ALAN Exposure While Sleeping and Prevalent Obesity, Weight Gain and Incident Obesity, With Further Adjustment for Confounders That Could Also Be Mediators of Associations Between ALAN Exposure at Night and Obesity

**eTable 3.** Comparison of Baseline Characteristics Between Those With and Without Body Mass Index Estimates at Follow-up

**eTable 4.** Prevalence Ratios and 95% CIs for the Association Between Other Sleep Characteristics and Measures of Prevalent Obesity

**eTable 5.** Relative Risks and 95% CIs for Other Sleep Characteristics, Subsequent Weight Gain, and Incident Obesity

**eTable 6.** Association Between ALAN Exposure While Sleeping and Incident Obesity (BMI  $\geq 30.0$ ) Stratified by Selected Factors

**eTable 7.** Adjusted Relative Risks and 95% CIs for the Joint Association of ALAN Exposure, Leisure Time Physical Activity, and Healthy Eating Index–2015 With Subsequent Weight Gain of  $\geq 5$  kg and Incident Obesity

**eTable 8.** Association Between ALAN Exposure While Sleeping and Subsequent Weight Gain Using Percent Increase in BMI as a Continuous Variable

**eTable 9.** Comparison of Baseline Characteristics Between 2 Categories (Clusters) of Women With Television in Room

**eTable 10.** Association Between ALAN Exposure While Sleeping, Subsequent Weight Gain, and Incident Obesity Including Adjustment for Categories (Clusters) of Women With Television in Room

**eTable 11.** Association Between ALAN Exposure While Sleeping, Subsequent Weight Gain and Incident Obesity, After Excluding Women Who Responded “Yes” to Waking Up for Any Reason Every Night or Most Nights (n = 26 849)

**eTable 12.** Association Between ALAN Exposure While Sleeping, Subsequent Weight Gain, and Incident Obesity, After Excluding Women Who Reported Taking Naps

**eTable 13.** Association Between ALAN Exposure While Sleeping, Subsequent Weight Gain, And Incident Obesity With Inverse Probability Weighting to Account for Loss to Follow-up

**eTable 14.** Association Between ALAN Exposure While Sleeping, Subsequent Weight Gain, And Incident Obesity in Analysis Limited to 1 Randomly Selected Woman per Sibship (n = 39 188)

**eTable 15.** Association Between ALAN Exposure While Sleeping and Sleep Hours

**eFigure.** Association Between ALAN Exposure While Sleeping, Subsequent Weight Gain, and Incident Obesity

This supplementary material has been provided by the authors to give readers additional information about their work.

**eTable 1.** Other Baseline Sleep Characteristics by Exposure to ALAN While Sleeping

| Characteristic                          |                                              | No ALAN exposure (n=7,807) | Small nightlight in room (n=17,320) | Light outside room (n=13,471) | Light/television in room (n=5,124) |
|-----------------------------------------|----------------------------------------------|----------------------------|-------------------------------------|-------------------------------|------------------------------------|
| Percent (%)                             |                                              |                            |                                     |                               |                                    |
| Sleep duration, hours                   |                                              |                            |                                     |                               |                                    |
|                                         | <7 hours                                     | 26.4                       | 25.4                                | 27.6                          | 42.8                               |
|                                         | 7-9 hours                                    | 72.7                       | 73.9                                | 71.6                          | 56.0                               |
|                                         | > 9 hours                                    | 0.9                        | 0.8                                 | 0.9                           | 1.2                                |
| When awakened at night, turns on light? |                                              |                            |                                     |                               |                                    |
|                                         | Never wakes up or does not turn on the light | 85.2                       | 89.6                                | 89.9                          | 82.0                               |
|                                         | Turns on light/ Light already on             | 14.8                       | 10.4                                | 10.1                          | 18.1                               |
| Wake-up pattern past 6 weeks            |                                              |                            |                                     |                               |                                    |
|                                         | Same every day                               | 66.6                       | 65.1                                | 64.4                          | 63.2                               |
|                                         | Same on workdays /Different on days off      | 22.2                       | 26.2                                | 25.4                          | 22.7                               |
|                                         | Different but consistent                     | 2.5                        | 2.5                                 | 3.1                           | 3.9                                |
|                                         | No consistent time                           | 8.7                        | 6.2                                 | 7.1                           | 10.2                               |
| Bedtime pattern past 6 weeks            |                                              |                            |                                     |                               |                                    |
|                                         | Same every day                               | 66.9                       | 66.2                                | 63.3                          | 53.7                               |
|                                         | Same on workdays /Different on days off      | 17.4                       | 20.2                                | 20.1                          | 19.3                               |
|                                         | Different but consistent                     | 5.0                        | 4.9                                 | 6.0                           | 7.7                                |
|                                         | No consistent time                           | 10.7                       | 8.7                                 | 10.7                          | 19.3                               |
| Time it takes to fall asleep            |                                              |                            |                                     |                               |                                    |
|                                         | < 15 min                                     | 47.6                       | 47.2                                | 44.0                          | 33.5                               |
|                                         | 15 - 30 min                                  | 35.7                       | 37.9                                | 39.3                          | 37.9                               |
|                                         | 30 min - 1 hour                              | 11.0                       | 10.8                                | 12.1                          | 16.4                               |
|                                         | > 1 hour                                     | 5.6                        | 4.2                                 | 4.6                           | 12.3                               |
| Frequency of waking up at night         |                                              |                            |                                     |                               |                                    |

|                                                      |                     |      |      |      |      |
|------------------------------------------------------|---------------------|------|------|------|------|
|                                                      | < 1 day a month     | 8.5  | 5.8  | 4.8  | 6.6  |
|                                                      | 1-3 days a month    | 8.5  | 6.7  | 5.9  | 5.8  |
|                                                      | ≥ once a week       | 25.9 | 25.5 | 25.3 | 24.4 |
|                                                      | Most or every night | 57.1 | 62.0 | 64.0 | 63.2 |
| Frequency of napping                                 |                     |      |      |      |      |
|                                                      | Never               | 38.2 | 34.0 | 30.3 | 31.4 |
|                                                      | < 1 day a month     | 20.6 | 22.5 | 22.2 | 19.1 |
|                                                      | 1-3 days a month    | 17.4 | 19.1 | 20.2 | 19.4 |
|                                                      | ≥ once a week       | 19.6 | 20.4 | 22.6 | 24.0 |
|                                                      | Most or every day   | 4.3  | 4.0  | 4.7  | 6.2  |
| Percent who used sleep medication in prior six weeks |                     |      |      |      |      |
|                                                      | Yes                 | 25.0 | 24.0 | 23.3 | 22.1 |

**eTable 2.** Associations Between ALAN Exposure While Sleeping and Prevalent Obesity, Weight Gain and Incident Obesity, With Further Adjustment for Confounders That Could Also Be Mediators of Associations Between ALAN Exposure at Night and Obesity

| Obesity parameter                                                                              |                                                                                                   | No ALAN exposure<br>(n=7,807) | Small nightlight in room<br>(n=17,320) | Light outside room<br>(n=13,471) | Light/television in room<br>(n=5,124) | P trend | No ALAN exposure<br>(n=7,807) | Any ALAN exposure<br>(n=35,915) |
|------------------------------------------------------------------------------------------------|---------------------------------------------------------------------------------------------------|-------------------------------|----------------------------------------|----------------------------------|---------------------------------------|---------|-------------------------------|---------------------------------|
|                                                                                                | Prevalence ratios for outcome in relation to exposure to artificial light at night while sleeping |                               |                                        |                                  |                                       |         |                               |                                 |
| BMI ≥ 30 kg/m <sup>2</sup>                                                                     | Percent of cases (%)                                                                              | 25.4                          | 25.8                                   | 30.0                             | 40.0                                  |         | 25.4                          | 29.4                            |
|                                                                                                | Multivariable-adjusted PR <sup>c</sup>                                                            | 1                             | 1.01 (1.00, 1.02)                      | 1.03 (1.02, 1.04)                | 1.05 (1.04, 1.07)                     | <0.001  | 1                             | 1.02 (1.01, 1.03)               |
|                                                                                                | Multivariable-adjusted PR <sup>d</sup>                                                            | 1                             | 1.00 (0.99, 1.01)                      | 1.02 (1.01, 1.03)                | 1.03 (1.02, 1.05)                     | <0.001  | 1                             | 1.01 (1.00, 1.02)               |
| BMI ≥ 25 kg/m <sup>2</sup>                                                                     | Percent of cases (%)                                                                              | 56.7                          | 58.0                                   | 62.4                             | 71.6                                  |         | 56.7                          | 61.6                            |
|                                                                                                | Multivariable-adjusted PR <sup>c</sup>                                                            | 1                             | 1.01 (1.01, 1.02)                      | 1.03 (1.02, 1.04)                | 1.04 (1.03, 1.05)                     | <0.001  | 1                             | 1.03 (1.02, 1.03)               |
|                                                                                                | Multivariable-adjusted PR <sup>d</sup>                                                            | 1                             | 1.01 (1.00, 1.02)                      | 1.03 (1.02, 1.03)                | 1.03 (1.02, 1.04)                     | <0.001  | 1                             | 1.02 (1.01, 1.03)               |
| Waist Circumference ≥88 cm                                                                     | Percent of cases (%)                                                                              | 35.5                          | 36.3                                   | 41.6                             | 50.5                                  |         | 35.5                          | 40.3                            |
|                                                                                                | Multivariable-adjusted PR <sup>c</sup>                                                            | 1                             | 1.05 (1.02, 1.09)                      | 1.15 (1.11, 1.19)                | 1.18 (1.13, 1.23)                     | <0.001  | 1                             | 1.11 (1.08, 1.15)               |
|                                                                                                | Multivariable-adjusted PR <sup>d</sup>                                                            | 1                             | 1.03 (1.00, 1.07)                      | 1.11 (1.08, 1.16)                | 1.12 (1.08, 1.17)                     | <0.001  | 1                             | 1.08 (1.04, 1.11)               |
| Waist Hip Ratio ≥0.85                                                                          | Percent of cases (%)                                                                              | 25.7                          | 24.4                                   | 27.2                             | 33.9                                  |         | 25.7                          | 26.8                            |
|                                                                                                | Multivariable-adjusted PR <sup>c</sup>                                                            | 1                             | 0.99 (0.95, 1.04)                      | 1.06 (1.01, 1.11)                | 1.11 (1.05, 1.17)                     | <0.001  | 1                             | 1.03 (0.99, 1.08)               |
|                                                                                                | Multivariable-adjusted PR <sup>d</sup>                                                            | 1                             | 0.98 (0.93, 1.02)                      | 1.03 (0.98, 1.08)                | 1.06 (1.00, 1.13)                     | 0.003   | 1                             | 1.01 (0.97, 1.06)               |
| Waist Height Ratio ≥0.5                                                                        | Percent of cases (%)                                                                              | 52.1                          | 52.1                                   | 57.0                             | 66.5                                  |         | 52.1                          | 56.0                            |
|                                                                                                | Multivariable-adjusted PR <sup>c</sup>                                                            | 1                             | 1.02 (1.00, 1.05)                      | 1.08 (1.06, 1.11)                | 1.12 (1.09, 1.15)                     | <0.001  | 1                             | 1.06 (1.04, 1.09)               |
|                                                                                                | Multivariable-adjusted PR <sup>d</sup>                                                            | 1                             | 1.01 (0.99, 1.04)                      | 1.06 (1.03, 1.09)                | 1.08 (1.05, 1.12)                     | <0.001  | 1                             | 1.04 (1.02, 1.07)               |
| Relative risks for outcome in relation to exposure to artificial light at night while sleeping |                                                                                                   |                               |                                        |                                  |                                       |         |                               |                                 |
| Weight gain of 5 kg or more                                                                    | Number of events                                                                                  | 1080                          | 2509                                   | 2040                             | 893                                   |         | 1080                          | 5442                            |
|                                                                                                | Cumulative incidence                                                                              | 15.6                          | 15.9                                   | 16.7                             | 21.5                                  |         | 15.5                          | 16.9                            |
|                                                                                                | Multivariable-adjusted RR <sup>c</sup>                                                            | 1                             | 1.00 (0.93, 1.06)                      | 1.01 (0.95, 1.09)                | 1.15 (1.05, 1.25)                     | 0.005   | 1                             | 1.02 (0.96, 1.09)               |
|                                                                                                | Multivariable-adjusted RR <sup>d</sup>                                                            | 1                             | 1.00 (0.93, 1.06)                      | 1.00 (0.93, 1.07)                | 1.13 (1.04, 1.23)                     | 0.02    | 1                             | 1.02 (0.96, 1.08)               |
| BMI percent increase of 10% or more                                                            | Number of events                                                                                  | 754                           | 1796                                   | 1439                             | 591                                   |         | 754                           | 3826                            |
|                                                                                                | Cumulative incidence                                                                              | 10.9                          | 11.4                                   | 11.9                             | 14.3                                  |         | 10.9                          | 11.9                            |
|                                                                                                | Multivariable-adjusted RR <sup>c</sup>                                                            | 1                             | 1.03 (0.95, 1.11)                      | 1.04 (0.95, 1.13)                | 1.11 (1.00, 1.24)                     | 0.07    | 1                             | 1.04 (0.97, 1.12)               |
|                                                                                                | Multivariable-adjusted RR <sup>d</sup>                                                            | 1                             | 1.03 (0.95, 1.12)                      | 1.03 (0.95, 1.12)                | 1.12 (1.01, 1.25)                     | 0.09    | 1                             | 1.04 (0.97, 1.12)               |
| Overweight (BMI ≥)                                                                             | Number of events                                                                                  | 459                           | 1110                                   | 766                              | 266                                   |         | 459                           | 2142                            |
|                                                                                                | Cumulative incidence                                                                              | 14.8                          | 16.5                                   | 16.4                             | 21.5                                  |         | 14.8                          | 16.9                            |

|                                                          |                                        |     |                   |                   |                   |       |     |                   |
|----------------------------------------------------------|----------------------------------------|-----|-------------------|-------------------|-------------------|-------|-----|-------------------|
| 25 kg/m <sup>2</sup> ) <sup>a</sup>                      | Multivariable-adjusted RR <sup>c</sup> | 1   | 1.11 (1.01, 1.23) | 1.07 (0.96, 1.20) | 1.21 (1.05, 1.39) | 0.05  | 1   | 1.11 (1.01, 1.22) |
|                                                          | Multivariable-adjusted RR <sup>d</sup> | 1   | 1.12 (1.01, 1.24) | 1.07 (0.96, 1.19) | 1.20 (1.03, 1.38) | 0.09  | 1   | 1.11 (1.01, 1.22) |
| Obesity<br>(BMI ≥<br>30 kg/m <sup>2</sup> ) <sup>b</sup> | No. of events                          | 306 | 791               | 628               | 246               |       | 306 | 1665              |
|                                                          | Cumulative incidence                   | 5.8 | 6.7               | 7.3               | 9.6               |       | 5.8 | 7.3               |
|                                                          | Multivariable-adjusted RR <sup>c</sup> | 1   | 1.15 (1.01, 1.31) | 1.19 (1.04, 1.36) | 1.27 (1.07, 1.50) | 0.005 | 1   | 1.18 (1.04, 1.33) |
|                                                          | Multivariable-adjusted RR <sup>d</sup> | 1   | 1.13 (0.99, 1.29) | 1.15 (1.00, 1.31) | 1.23 (1.04, 1.46) | 0.02  | 1   | 1.15 (1.02, 1.30) |

Abbreviations: BMI, body mass index, PR, prevalence ratio, and RR, relative risk.

Data are presented as prevalence ratio or relative risk (95% confidence intervals).

<sup>a</sup> among women with a BMI < 25 kg/m<sup>2</sup> at baseline (n=17,179).

<sup>b</sup> among women with a BMI < 30 kg/m<sup>2</sup> at baseline (n=31,188).

<sup>c</sup> Additionally adjusted for sleep duration (<7, 7-9, >9), turns on light when awakened at night (yes/no), bedtime pattern (same every day, same on workdays /different on days off, different but consistent, no consistent time), number of wake-ups (< 1 day a month, 1-3 days a month, ≥ once a week, most or every night), time it takes to fall asleep (< 15 min, 15-30 min, 30 min-1 hour, > 1 hour), frequency of napping (never, < 1 day a month, 1-3 days a month, ≥ once a week, most or every day), and sleep medication use

<sup>d</sup> Additionally adjusted for total physical activity (MET-h/wk, quintiles), leisure time physical activity (insufficient, moderate, high), total energy intake, fat consumption (quintiles), fiber consumption (quintiles), glycemic load (quintiles), and night time snacking (yes, no).

**eTable 3.** Comparison of Baseline Characteristics Between Those With and Without Body Mass Index Estimates at Follow-up

| Characteristic                            | Complete follow-up |        | Lost to follow-up |        |
|-------------------------------------------|--------------------|--------|-------------------|--------|
|                                           | n (%)              |        |                   |        |
| n (%)                                     | 38,950             | (89.1) | 4,772             | (10.9) |
| <b>Mean (SD)</b>                          |                    |        |                   |        |
| Age at baseline, y                        | 55.5               | (8.8)  | 54.1              | (9.4)  |
| BMI (kg/m <sup>2</sup> )                  | 27.3               | (5.7)  | 28.8              | (6.4)  |
| Waist circumference (cm)                  | 85.2               | (14.0) | 89.1              | (14.9) |
| Waist hip ratio                           | 0.80               | (0.08) | 0.82              | (0.08) |
| Waist height ratio                        | 0.52               | (0.09) | 0.54              | (0.09) |
| Sleep duration, h                         | 7.1                | (1.0)  | 6.9               | (1.2)  |
| Total MET-h/wk of physical activity       | 51.1               | (31.2) | 49.5              | (30.3) |
| Caffeine consumption (mg/d) <sup>a</sup>  | 27.9               | (38.2) | 29.1              | (39.1) |
| Fiber consumption (g) <sup>a</sup>        | 17.3               | (8.4)  | 15.8              | (8.4)  |
| Fat consumption (g) <sup>a</sup>          | 68.4               | (30.1) | 67.8              | (32.7) |
| Total energy intake (kcal/d) <sup>a</sup> | 1630               | (627)  | 1620              | (724)  |
| Glycemic load <sup>a</sup>                | 84.5               | (37.0) | 88.0              | (42.0) |
| Health Eating Index-2015 <sup>a</sup>     | 72.0               | (9.3)  | 69.7              | (9.8)  |
| <b>Proportion (%)</b>                     |                    |        |                   |        |
| Light at night exposure while sleeping    |                    |        |                   |        |
| No light                                  | 17.8               |        | 18.7              |        |
| Small nightlight                          | 40.5               |        | 32.8              |        |
| Light outside the room                    | 31.2               |        | 27.9              |        |
| Light/television in room                  | 10.6               |        | 20.6              |        |
| Race/ethnicity                            |                    |        |                   |        |
| Non-Hispanic White                        | 86.9               |        | 61.5              |        |
| Non-Hispanic Black                        | 6.8                |        | 22.4              |        |
| Hispanic                                  | 3.9                |        | 13.2              |        |
| Other                                     | 2.4                |        | 2.9               |        |
| Residential location                      |                    |        |                   |        |
| Urban                                     | 21.0               |        | 19.2              |        |
| Suburban or Small town                    | 60.5               |        | 56.3              |        |
| Rural                                     | 18.5               |        | 24.5              |        |
| Marital status                            |                    |        |                   |        |
| Never married                             | 5.0                |        | 7.2               |        |
| Married, living as married                | 76.7               |        | 67.4              |        |
| Separated, divorced, widowed              | 18.3               |        | 25.4              |        |
| Educational attainment                    |                    |        |                   |        |
| High school degree or less                | 14.4               |        | 18.6              |        |
| Some college                              | 32.3               |        | 40.6              |        |
| College degree or higher                  | 53.3               |        | 40.8              |        |
| Income                                    |                    |        |                   |        |
| < \$49,999                                | 22.4               |        | 32.2              |        |
| \$50,000-\$99,999                         | 39.8               |        | 37.7              |        |

|                                                 |      |  |      |  |
|-------------------------------------------------|------|--|------|--|
| ≥ \$100,000                                     | 34.1 |  | 25.6 |  |
| Missing                                         | 3.8  |  | 4.5  |  |
| No. family members aged <18 y                   |      |  |      |  |
| None                                            | 56.7 |  | 46.0 |  |
| 1                                               | 12.3 |  | 15.5 |  |
| 2                                               | 10.1 |  | 11.6 |  |
| ≥3                                              | 4.3  |  | 5.8  |  |
| Missing                                         | 16.6 |  | 21.1 |  |
| No. family members aged ≥65 y                   |      |  |      |  |
| None                                            | 63.6 |  | 62.2 |  |
| 1                                               | 9.6  |  | 8.7  |  |
| ≥2                                              | 10.3 |  | 8.0  |  |
| Missing                                         | 16.6 |  | 21.1 |  |
| Alcohol consumption                             |      |  |      |  |
| Never                                           | 3.6  |  | 5.3  |  |
| Former                                          | 13.9 |  | 19.4 |  |
| Current consumption, ≤ 1 drink/d                | 71.2 |  | 65.4 |  |
| Current consumption, > 1 drink/d                | 11.3 |  | 9.8  |  |
| Smoking status                                  |      |  |      |  |
| Never                                           | 57.4 |  | 54.6 |  |
| Former                                          | 35.4 |  | 32.6 |  |
| Current                                         | 7.2  |  | 12.8 |  |
| Leisure time physical activity (MET hours/week) |      |  |      |  |
| < 7.5                                           | 43.7 |  | 53.9 |  |
| 7.5-21                                          | 32.5 |  | 28.0 |  |
| ≥ 21                                            | 23.8 |  | 18.1 |  |
| Night-time snacking (yes)                       | 7.2  |  | 13.1 |  |
| Menopause (yes)                                 | 64.9 |  | 59.3 |  |
| Perceived stress in highest quartile            | 21.8 |  | 31.5 |  |
| Depression (yes)                                | 19.9 |  | 24.2 |  |
| Type 2 diabetes (yes)                           | 5.1  |  | 8.1  |  |
| Hypertension (yes)                              | 31.2 |  | 37.5 |  |
| High cholesterol level (yes)                    | 34.5 |  | 35.6 |  |

Abbreviations: BMI, body mass index; MET, metabolic equivalent.

Data are presented as mean (standard deviation), or percentage.

<sup>a</sup> Calculated after excluding women who reported implausibly extreme energy intakes (<500 and >5000 kcals/d).



**eTable 4.** Prevalence Ratios and 95% CIs for the Association Between Other Sleep Characteristics and Measures of Prevalent Obesity

|                                                  |                                                 | N     | Obesity<br>(BMI ≥30) | Overweight<br>(BMI ≥25) | Waist<br>Circumference<br>≥88cm | Waist Hip Ratio<br>≥0.85 | Waist Height<br>Ratio ≥0.5 |
|--------------------------------------------------|-------------------------------------------------|-------|----------------------|-------------------------|---------------------------------|--------------------------|----------------------------|
| Sleep duration,<br>hours                         | <6h                                             | 3315  | 1.04 (1.03, 1.06)    | 1.03 (1.02, 1.04)       | 1.11 (1.07, 1.15)               | 1.02 (0.97, 1.08)        | 1.08 (1.05, 1.11)          |
|                                                  | 6-6.9 h                                         | 9056  | 1.02 (1.01, 1.03)    | 1.01 (1.01, 1.02)       | 1.07 (1.04, 1.10)               | 1.04 (1.00, 1.08)        | 1.05 (1.03, 1.07)          |
|                                                  | 7-9 h                                           | 30918 | 1 (referent)         | 1 (referent)            | 1 (referent)                    | 1 (referent)             | 1 (referent)               |
|                                                  | > 9 h                                           | 377   | 1.02 (0.98, 1.06)    | 1.02 (0.99, 1.05)       | 1.11 (1.00, 1.23)               | 0.96 (0.82, 1.13)        | 1.11 (1.04, 1.20)          |
| When<br>awakened at<br>night, turns on<br>light? | Never wakes up or does<br>not turn on the light | 37576 | 1 (referent)         | 1 (referent)            | 1 (referent)                    | 1 (referent)             | 1 (referent)               |
|                                                  | Turns on light/ Light<br>already on             | 5144  | 1.02 (1.01, 1.03)    | 1.02 (1.01, 1.03)       | 1.10 (1.07, 1.14)               | 1.12 (1.08, 1.17)        | 1.08 (1.06, 1.11)          |
| Wake-up<br>pattern past 6<br>weeks               | Same every day                                  | 28388 | 1 (referent)         | 1 (referent)            | 1 (referent)                    | 1 (referent)             | 1 (referent)               |
|                                                  | Same on workdays<br>/Different on days off      | 10823 | 1.01 (1.00, 1.02)    | 1.01 (1.00, 1.02)       | 1.03 (1.00, 1.06)               | 1.01 (0.97, 1.05)        | 1.02 (1.00, 1.04)          |
|                                                  | Different but consistent<br>from week to week   | 1245  | 1.01 (0.99, 1.03)    | 1.01 (0.99, 1.03)       | 1.06 (0.99, 1.13)               | 1.03 (0.94, 1.13)        | 1.07 (1.02, 1.12)          |
|                                                  | No consistent time                              | 3262  | 1.04 (1.02, 1.05)    | 1.02 (1.01, 1.03)       | 1.11 (1.07, 1.15)               | 1.09 (1.04, 1.15)        | 1.07 (1.04, 1.10)          |
|                                                  | P trend                                         |       | <0.001               | <0.001                  | <0.001                          | 0.001                    | <0.001                     |
| Bedtime<br>pattern past 6<br>weeks               | Same every day                                  | 27950 | 1 (referent)         | 1 (referent)            | 1 (referent)                    | 1 (referent)             | 1 (referent)               |
|                                                  | Same on workdays<br>/Different on days off      | 8552  | 1.01 (1.00, 1.02)    | 1.01 (1.00, 1.02)       | 1.05 (1.02, 1.09)               | 1.05 (1.00, 1.09)        | 1.05 (1.02, 1.07)          |
|                                                  | Different but consistent<br>from week to week   | 2428  | 1.02 (1.01, 1.04)    | 1.02 (1.01, 1.03)       | 1.10 (1.05, 1.15)               | 1.07 (1.00, 1.14)        | 1.09 (1.05, 1.12)          |
|                                                  | No consistent time                              | 4785  | 1.05 (1.04, 1.06)    | 1.04 (1.03, 1.05)       | 1.19 (1.15, 1.23)               | 1.14 (1.09, 1.19)        | 1.12 (1.09, 1.14)          |
|                                                  | P trend                                         |       | <0.001               | <0.001                  | <0.001                          | <0.001                   | <0.001                     |
| Time it takes to<br>fall asleep                  | < 15 min                                        | 19478 | 1 (referent)         | 1 (referent)            | 1 (referent)                    | 1 (referent)             | 1 (referent)               |
|                                                  | 15-30 min                                       | 16548 | 1.00 (0.99, 1.00)    | 1.00 (1.00, 1.01)       | 1.01 (0.99, 1.04)               | 1.03 (0.99, 1.06)        | 1.03 (1.01, 1.05)          |
|                                                  | 30 min-1 hour                                   | 5203  | 1.01 (0.99, 1.01)    | 1.01 (1.00, 1.02)       | 1.05 (1.01, 1.09)               | 1.04 (0.99, 1.10)        | 1.06 (1.03, 1.08)          |
|                                                  | > 1 hour                                        | 2435  | 1.04 (1.02, 1.06)    | 1.04 (1.02, 1.05)       | 1.16 (1.11, 1.21)               | 1.14 (1.07, 1.21)        | 1.12 (1.09, 1.15)          |

|                                         |                     |       |                   |                   |                   |                   |                   |
|-----------------------------------------|---------------------|-------|-------------------|-------------------|-------------------|-------------------|-------------------|
|                                         | P trend             |       | <0.001            | <0.001            | <0.001            | <0.001            | <0.001            |
| Frequency of waking up at night         | < 1 day a month     | 2631  | 1 (referent)      |
|                                         | 1-3 days a month    | 2892  | 0.98 (0.97, 1.00) | 1.00 (0.98, 1.01) | 0.97 (0.90, 1.03) | 0.97 (0.88, 1.05) | 0.98 (0.93, 1.02) |
|                                         | ≥ once a week       | 11014 | 0.99 (0.98, 1.01) | 0.99 (0.98, 1.00) | 0.96 (0.91, 1.01) | 0.96 (0.89, 1.03) | 0.95 (0.91, 0.98) |
|                                         | Most or every night | 26849 | 1.02 (1.01, 1.03) | 1.00 (0.99, 1.02) | 1.05 (1.00, 1.10) | 1.00 (0.94, 1.06) | 0.99 (0.96, 1.03) |
|                                         | P trend             |       | <0.001            | 0.04              | <0.001            | 0.32              | 0.13              |
| Frequency of napping                    | Never               | 14532 | 1 (referent)      |
|                                         | < 1 day a month     | 9448  | 1.02 (1.01, 1.03) | 1.02 (1.01, 1.03) | 1.10 (1.06, 1.14) | 1.08 (1.04, 1.13) | 1.08 (1.06, 1.11) |
|                                         | 1-3 days a month    | 8390  | 1.04 (1.03, 1.05) | 1.04 (1.03, 1.05) | 1.19 (1.15, 1.23) | 1.14 (1.09, 1.19) | 1.13 (1.10, 1.16) |
|                                         | ≥ once a week       | 9352  | 1.06 (1.05, 1.06) | 1.05 (1.04, 1.06) | 1.24 (1.20, 1.28) | 1.20 (1.15, 1.25) | 1.17 (1.14, 1.20) |
|                                         | Most or every day   | 1989  | 1.07 (1.05, 1.09) | 1.06 (1.05, 1.07) | 1.27 (1.21, 1.33) | 1.25 (1.17, 1.33) | 1.20 (1.16, 1.24) |
|                                         | P trend             |       | <0.001            | <0.001            | <0.001            | <0.001            | <0.001            |
| Sleep medication use in prior six weeks | None                | 33307 | 1 (referent)      |
|                                         | Yes                 | 10413 | 0.99 (0.98, 1.00) | 0.99 (0.98, 0.99) | 0.97 (0.95, 1.00) | 1.01 (0.98, 1.05) | 0.98 (0.96, 1.00) |

<sup>a</sup> Adjusted for age at baseline, race/ethnicity (non-Hispanic white, non-Hispanic black, Hispanic, others), residential location (urban, suburban or small town, rural), educational attainment (high school degree or less, some college, college degree or higher), household income (<\$49,999, \$50,000-\$99,999, \$100,000+, missing), number of family members <18 years living in household (none, 1, 2, ≥3, missing), and number of family members ≥65 years living in household (none, 1, ≥2, missing), marital status (never married, married, other), smoking status (never smoker, current smoker, former smoker), alcohol consumption (never, former, current drinker ≤ 1 drink/day, current drinker > 1 drink/day), caffeine consumption (quintiles), menopausal status, depression, and perceived stress (quartile)

**eTable 5.** Relative Risks and 95% CIs for Other Sleep Characteristics, Subsequent Weight Gain, and Incident Obesity

|                                         |                                              | Weight gain of 5 kg or more | BMI percent increase of 10% or more | Overweight (BMI ≥ 25 kg/m <sup>2</sup> ) <sup>b</sup> | Obesity (BMI ≥ 30 kg/m <sup>2</sup> ) <sup>c</sup> |
|-----------------------------------------|----------------------------------------------|-----------------------------|-------------------------------------|-------------------------------------------------------|----------------------------------------------------|
| Sleep duration                          | <7 hours                                     | 1.10 (1.05, 1.16)           | 1.11 (1.05, 1.18)                   | 1.05 (0.97, 1.14)                                     | 1.17 (1.06, 1.28)                                  |
|                                         | 7-9 hours                                    | 1 (referent)                | 1 (referent)                        | 1 (referent)                                          | 1 (referent)                                       |
|                                         | > 9 hours                                    | 1.35 (1.10, 1.64)           | 1.40 (1.10, 1.79)                   | 1.37 (0.99, 1.92)                                     | 1.18 (0.77, 1.80)                                  |
| When awakened at night, turns on light? | Never wakes up or does not turn on the light | 1 (referent)                | 1 (referent)                        | 1 (referent)                                          | 1 (referent)                                       |
|                                         | Turns on light/ Light already on             | 1.06 (0.99, 1.13)           | 1.05 (0.96, 1.14)                   | 1.16 (1.04, 1.29)                                     | 1.18 (1.04, 1.33)                                  |
| Wake-up pattern past 6 weeks            | Same every day                               | 1 (referent)                | 1 (referent)                        | 1 (referent)                                          | 1 (referent)                                       |
|                                         | Same on workdays /Different on days off      | 0.97 (0.92, 1.02)           | 1.00 (0.94, 1.07)                   | 0.95 (0.88, 1.03)                                     | 1.07 (0.97, 1.18)                                  |
|                                         | Different but consistent from week to week   | 0.97 (0.84, 1.11)           | 1.01 (0.86, 1.19)                   | 0.97 (0.77, 1.22)                                     | 1.06 (0.83, 1.36)                                  |
|                                         | No consistent time                           | 1.00 (0.92, 1.10)           | 1.04 (0.93, 1.16)                   | 1.06 (0.91, 1.22)                                     | 1.11 (0.94, 1.31)                                  |
|                                         | P trend                                      | 0.49                        | 0.53                                | 0.93                                                  | 0.09                                               |
| Bedtime pattern past 6 weeks            | Same every day                               | 1 (referent)                | 1 (referent)                        | 1 (referent)                                          | 1 (referent)                                       |
|                                         | Same on workdays /Different on days off      | 1.02 (0.97, 1.08)           | 1.06 (0.99, 1.13)                   | 0.99 (0.90, 1.08)                                     | 1.11 (0.99, 1.23)                                  |
|                                         | Different but consistent from week to week   | 1.04 (0.95, 1.14)           | 1.00 (0.89, 1.13)                   | 1.11 (0.95, 1.29)                                     | 1.20 (1.01, 1.44)                                  |
|                                         | No consistent time                           | 1.06 (0.99, 1.14)           | 1.05 (0.96, 1.15)                   | 1.10 (0.97, 1.24)                                     | 1.19 (1.04, 1.37)                                  |
|                                         | P trend                                      | 0.07                        | 0.22                                | 0.12                                                  | 0.002                                              |
| Time it takes to fall asleep            | < 15 min                                     | 1 (referent)                | 1 (referent)                        | 1 (referent)                                          | 1 (referent)                                       |
|                                         | 15-30 min                                    | 0.99 (0.95, 1.04)           | 1.03 (0.97, 1.09)                   | 1.08 (1.00, 1.17)                                     | 1.08 (0.98, 1.19)                                  |
|                                         | 30 min-1 hour                                | 1.04 (0.97, 1.11)           | 1.08 (0.98, 1.17)                   | 1.18 (1.06, 1.32)                                     | 1.05 (0.91, 1.21)                                  |
|                                         | > 1 hour                                     | 1.02 (0.93, 1.13)           | 1.08 (0.96, 1.22)                   | 1.28 (1.08, 1.51)                                     | 1.27 (1.05, 1.54)                                  |
|                                         | P trend                                      | 0.43                        | 0.07                                | <0.001                                                | 0.03                                               |
| Frequency of waking up at night         | < 1 day a month                              | 1 (referent)                | 1 (referent)                        | 1 (referent)                                          | 1 (referent)                                       |
|                                         | 1-3 days a month                             | 1.01 (0.87, 1.17)           | 0.93 (0.78, 1.11)                   | 1.16 (0.89, 1.50)                                     | 1.07 (0.79, 1.43)                                  |
|                                         | ≥ once a week                                | 1.06 (0.91, 1.23)           | 0.99 (0.82, 1.18)                   | 1.20 (0.92, 1.57)                                     | 1.09 (0.81, 1.47)                                  |
|                                         | Most or every night                          | 1.04 (0.88, 1.21)           | 0.94 (0.78, 1.14)                   | 1.10 (0.84, 1.45)                                     | 1.09 (0.80, 1.49)                                  |
|                                         | P trend                                      | 0.17                        | 0.52                                | 0.97                                                  | 0.61                                               |
|                                         | Never                                        | 1 (referent)                | 1 (referent)                        | 1 (referent)                                          | 1 (referent)                                       |

|                                         |                   |                   |                   |                   |                   |
|-----------------------------------------|-------------------|-------------------|-------------------|-------------------|-------------------|
| Frequency of napping                    | < 1 day a month   | 0.99 (0.93, 1.05) | 0.97 (0.90, 1.04) | 1.01 (0.92, 1.11) | 1.04 (0.92, 1.17) |
|                                         | 1-3 days a month  | 1.03 (0.97, 1.10) | 0.97 (0.89, 1.04) | 1.11 (1.00, 1.22) | 1.03 (0.91, 1.16) |
|                                         | ≥ once a week     | 1.09 (1.02, 1.16) | 1.05 (0.97, 1.13) | 1.19 (1.08, 1.31) | 1.22 (1.08, 1.37) |
|                                         | Most or every day | 1.01 (0.90, 1.14) | 0.99 (0.86, 1.15) | 1.09 (0.89, 1.33) | 1.28 (1.04, 1.58) |
|                                         | P trend           | 0.02              | 0.44              | <0.001            | <0.001            |
| Sleep medication use in prior six weeks | None              | 1 (referent)      | 1 (referent)      | 1 (referent)      | 1 (referent)      |
|                                         | Yes               | 1.08 (1.03, 1.14) | 1.12 (1.05, 1.19) | 1.13 (1.04, 1.22) | 1.05 (0.95, 1.16) |

Abbreviations: BMI, body mass index.

<sup>a</sup> Adjusted for age at baseline, log of follow-up time, race/ethnicity (non-Hispanic white, non-Hispanic black, Hispanic, others), residential location (urban, suburban or small town, rural), educational attainment (high school degree or less, some college, college degree or higher), household income (<\$49,999, \$50,000-\$99,999, \$100,000+, missing), number of family members <18 years living in household (none, 1, 2, ≥3, missing), and number of family members ≥65 years living in household (none, 1, ≥2, missing), marital status (never married, married, other), smoking status (never smoker, current smoker, former smoker), alcohol consumption (never, former, current drinker ≤ 1 drink/day, current drinker > 1 drink/day), caffeine consumption (quintiles), menopausal status, depression, and perceived stress (quartile).

<sup>b</sup> among women with a BMI < 25 kg/m<sup>2</sup> at baseline.

<sup>c</sup> among women with a BMI < 30 kg/m<sup>2</sup> at baseline.

**eTable 6.** Association Between ALAN Exposure While Sleeping and Incident Obesity (BMI  $\geq 30.0$ ) Stratified by Selected Factors

|                          |                                                       | Number of participants at baseline | Adjusted <sup>a</sup> relative risk and 95% CIs for incident obesity (Light/television in room vs. no light) | P for trend <sup>b</sup> | P interaction |
|--------------------------|-------------------------------------------------------|------------------------------------|--------------------------------------------------------------------------------------------------------------|--------------------------|---------------|
| BMI (kg/m <sup>2</sup> ) | 18.5 to < 25 (normal weight)                          | 15317                              | 1.78 (0.86-3.69)                                                                                             | 0.30                     |               |
|                          | 25 to <30 (overweight)                                | 12475                              | 1.14 (0.97-1.34)                                                                                             | 0.10                     | 0.19          |
| Age group                | < 50 y                                                | 8260                               | 1.53 (1.17-2.00)                                                                                             | 0.009                    |               |
|                          | 50-59 y                                               | 10895                              | 1.27 (0.97-1.65)                                                                                             | 0.13                     |               |
|                          | $\geq 60$ y                                           | 9066                               | 1.16 (0.81-1.67)                                                                                             | 0.05                     | 0.98          |
| Race/ethnicity           | Non-Hispanic White                                    | 25144                              | 1.35 (1.12-1.63)                                                                                             | <0.001                   |               |
|                          | Non-Hispanic Black                                    | 1327                               | 1.14 (0.74-1.75)                                                                                             | 0.73                     |               |
|                          | Other <sup>c</sup>                                    | 1747                               | 1.87 (1.01-3.47)                                                                                             | 0.18                     | 0.69          |
| Residential location     | Urban                                                 | 5758                               | 1.30 (0.90-1.88)                                                                                             | 0.45                     |               |
|                          | Suburban, small town                                  | 17237                              | 1.28 (1.04-1.59)                                                                                             | 0.23                     |               |
|                          | Rural                                                 | 5184                               | 1.54 (1.07-2.21)                                                                                             | 0.005                    | 0.26          |
| Educational attainment   | High school degree or less                            | 3725                               | 1.32 (0.89-1.97)                                                                                             | 0.11                     |               |
|                          | Some college                                          | 8503                               | 1.36 (1.04-1.77)                                                                                             | 0.01                     |               |
|                          | College degree or higher                              | 15991                              | 1.37 (1.07-1.76)                                                                                             | 0.06                     | 0.79          |
| Income                   | < \$49,999                                            | 5574                               | 1.56 (1.13-2.15)                                                                                             | 0.05                     |               |
|                          | \$50,000-\$99,999                                     | 10826                              | 0.95 (0.74-1.22)                                                                                             | 0.71                     |               |
|                          | $\geq$ \$100,000                                      | 10668                              | 1.88 (1.37-2.59)                                                                                             | <0.001                   | 0.11          |
| Household composition    | Absence of a family member aged <18 y or $\geq 65$ y  | 10721                              | 1.42 (1.08-1.87)                                                                                             | 0.007                    |               |
|                          | Presence of a family member aged <18 y or $\geq 65$ y | 13189                              | 1.16 (0.91-1.48)                                                                                             | 0.20                     | 0.03          |
| Smoking                  | Never                                                 | 16311                              | 1.28 (1.02-1.61)                                                                                             | 0.01                     |               |
|                          | Former                                                | 9855                               | 1.39 (1.04-1.85)                                                                                             | 0.02                     |               |
|                          | Current                                               | 2054                               | 1.34 (0.88-2.04)                                                                                             | 0.25                     | 0.74          |
| Alcohol consumption      | Never/former                                          | 4399                               | 1.41 (0.98-2.01)                                                                                             | 0.11                     |               |
|                          | Current, $\leq 1$ drink per day                       | 20197                              | 1.27 (1.04-1.54)                                                                                             | 0.008                    |               |

|                                                    |                            |       |                  |       |       |
|----------------------------------------------------|----------------------------|-------|------------------|-------|-------|
|                                                    | Current, > 1 drink per day | 3591  | 1.75 (1.01-3.03) | 0.08  | 0.79  |
| Sleep duration <sup>d</sup>                        | <7 h                       | 7090  | 1.45 (1.09-1.91) | 0.02  |       |
|                                                    | 7-9 h                      | 20877 | 1.28 (1.04-1.58) | 0.01  | 0.77  |
| Leisure time physical activity (MET-h/wk)          | < 7.5 (insufficient)       | 10662 | 1.21 (0.96-1.52) | 0.08  |       |
|                                                    | 7.5 to 21 (moderate)       | 9578  | 1.33 (0.99-1.78) | 0.02  |       |
|                                                    | ≥ 21 (high)                | 7962  | 1.64 (1.11-2.41) | 0.13  | 0.14  |
| Healthy Eating Index-2015, tertile <sup>e</sup>    | 1 (lower diet quality)     | 9230  | 1.05 (0.83-1.33) | 0.89  |       |
|                                                    | 2                          | 9230  | 1.51 (1.13-2.03) | 0.005 |       |
|                                                    | 3 (higher diet quality)    | 9230  | 1.71 (1.18-2.48) | 0.003 | 0.001 |
| Night time snacking                                | No                         | 26177 | 1.34 (1.12-1.60) | 0.002 |       |
|                                                    | Yes                        | 1560  | 1.39 (0.84-2.30) | 0.09  | 0.12  |
| Having diabetes, hypertension, or high cholesterol | No                         | 15834 | 1.38 (1.08-1.76) | 0.009 |       |
|                                                    | Yes                        | 12322 | 1.25 (1.00-1.55) | 0.06  | 0.28  |

Abbreviations: BMI, body mass index; MET, metabolic equivalent.

<sup>a</sup> Adjusted for age at baseline, log of follow-up time, race/ethnicity (non-Hispanic white, non-Hispanic black, Hispanic, others), residential location (urban, suburban or small town, rural), educational attainment (high school degree or less, some college, college degree or higher), household income (<\$49,999, \$50,000-\$99,999, \$100,000+, missing), number of family members <18 years living in household (none, 1, 2, ≥3, missing), and number of family members ≥65 years living in household (none, 1, ≥2, missing), marital status (never married, married, other), smoking status (never smoker, current smoker, former smoker), alcohol consumption (never, former, current drinker ≤ 1 drink/day, current drinker > 1 drink/day), caffeine consumption (quintiles), menopausal status, depression, and perceived stress (quartile) except a stratifying variable.

<sup>b</sup> Tests for linear trend across each category of exposure to artificial light at night while sleeping (no light, small nightlight, light outside the room, and light/television in room) were performed.

<sup>c</sup> A modified obesity cutoff (BMI ≥25 kg/m<sup>2</sup>) was applied for Asian Americans.

<sup>d</sup> Subjects with a sleep duration > 9 hours were not analyzed due to small sample size (n=221).

<sup>e</sup> Calculated after excluding women who reported implausibly extreme energy intakes (<500 and >5000 kcals/d).

**eTable 7.** Adjusted Relative Risks and 95% CIs for the Joint Association of ALAN Exposure, Leisure Time Physical Activity, and Healthy Eating Index–2015 With Subsequent Weight Gain of  $\geq 5$  kg and Incident Obesity

|                                            |      |                          | Leisure time physical activity |                   | Healthy Eating Index-2015          |                                   |
|--------------------------------------------|------|--------------------------|--------------------------------|-------------------|------------------------------------|-----------------------------------|
|                                            |      |                          | High                           | Insufficient      | Tertile 3<br>(higher quality diet) | Tertile 1<br>(lower quality diet) |
| Weight gain of 5 kg or more                | ALAN | No ALAN exposure         | 1                              | 1.32 (1.14, 1.52) | 1                                  | 1.45 (1.26, 1.67)                 |
|                                            |      | Light/television in room | 1.40 (1.16, 1.69)              | 1.35 (1.16, 1.56) | 1.37 (1.15, 1.64)                  | 1.47 (1.27, 1.70)                 |
| Obesity (BMI $\geq 30$ kg/m <sup>2</sup> ) | ALAN | No ALAN exposure         | 1                              | 1.96 (1.47, 2.63) | 1                                  | 2.05 (1.54, 2.73)                 |
|                                            |      | Light/television in room | 1.72 (1.17, 2.53)              | 2.21 (1.63, 2.98) | 1.82 (1.26, 2.62)                  | 2.05 (1.52, 2.76)                 |

<sup>a</sup> Adjusted for age at baseline, log of follow-up time, race/ethnicity (non-Hispanic white, non-Hispanic black, Hispanic, others), residential location (urban, suburban or small town, rural), educational attainment (high school degree or less, some college, college degree or higher), household income (<\$49,999, \$50,000-\$99,999, \$100,000+, missing), number of family members <18 years living in household (none, 1, 2,  $\geq 3$ , missing), and number of family members  $\geq 65$  years living in household (none, 1,  $\geq 2$ , missing), marital status (never married, married, other), smoking status (never smoker, current smoker, former smoker), alcohol consumption (never, former, current drinker  $\leq 1$  drink/day, current drinker  $> 1$  drink/day), caffeine consumption (quintiles), menopausal status, depression, and perceived stress (quartile), as well as Healthy Eating Index-2015 for leisure time physical activity and leisure time physical activity for Healthy Eating Index-2015.

**eTable 8.** Association Between ALAN Exposure While Sleeping and Subsequent Weight Gain Using Percent Increase in BMI as a Continuous Variable<sup>a</sup>

|                            |                                                  | Beta-coefficient and 95% CI for outcome in relation to exposure to artificial light at night while sleeping compared to no light |                          |                    |                          |         |
|----------------------------|--------------------------------------------------|----------------------------------------------------------------------------------------------------------------------------------|--------------------------|--------------------|--------------------------|---------|
|                            | Outcome                                          | No ALAN exposure                                                                                                                 | Small nightlight in room | Light outside room | Light/television in room | P trend |
| Percentage increase in BMI | Self-reported BMI in all women (n=31,301)        | Ref                                                                                                                              | 0.04 (-0.17, 0.25)       | 0.04 (-0.18, 0.26) | <b>0.44 (0.15, 0.74)</b> | 0.02    |
|                            | Measured BMI in subcohort <sup>b</sup> (n=1,569) | Ref                                                                                                                              | 0.19 (-0.82, 1.21)       | 0.85 (-0.21, 1.91) | 1.39 (-0.04, 2.82)       | 0.02    |
| Absolute increase in BMI   | Self-reported BMI in all women (n=31,301)        | Ref                                                                                                                              | 0.01 (-0.05, 0.07)       | 0.03 (-0.03, 0.09) | <b>0.16 (0.08, 0.23)</b> | 0.004   |
|                            | Measured BMI in subcohort <sup>b</sup> (n=1,569) | Ref                                                                                                                              | 0.06 (-0.21, 0.34)       | 0.25 (-0.03, 0.54) | <b>0.48 (0.09, 0.86)</b> | 0.01    |

Abbreviations: BMI, body mass index. Data are presented as beta-coefficient (95% confidence interval). Women with 5% weight loss which may be related to intentional or unintentional weight loss and extreme values of BMI increase (>99 percentile) were excluded in the analyses.

<sup>a</sup> Adjusted for age at baseline, log of follow-up time, race/ethnicity (non-Hispanic white, non-Hispanic black, Hispanic, others), residential location (urban, suburban or small town, rural), educational attainment (high school degree or less, some college, college degree or higher), household income (<\$49,999, \$50,000-\$99,999, \$100,000+, missing), number of family members <18 years (none, 1, 2, ≥3, missing), and number of family members ≥65 years (none, 1, ≥2, missing), marital status (never married, married, other), smoking status (never smoker, current smoker, former smoker), alcohol consumption (never, former, current drinker ≤ 1 drink/day, current drinker > 1 drink/day), caffeine consumption (quintiles), menopausal status, depression, and perceived stress (quartile).

<sup>b</sup> A subsample of women who had their height and weight remeasured at 7.9 years of median follow-up.



**eTable 9.** Comparison of Baseline Characteristics Between 2 Categories (Clusters) of Women With Television in Room

| Characteristic                            | Television in room cluster 1 |        | Television in room cluster 2 |        |
|-------------------------------------------|------------------------------|--------|------------------------------|--------|
|                                           | n (%)                        |        | n (%)                        |        |
| <b>n (%)</b>                              | 1,667                        | (54.9) | 1,368                        | (45.1) |
| <b>Mean (SD)</b>                          |                              |        |                              |        |
| Age at baseline, y                        | 53.5                         | (8.4)  | 53.3                         | (8.5)  |
| BMI (kg/m <sup>2</sup> )                  | 27.5                         | (5.3)  | 31.6                         | (6.7)  |
| Waist circumference (cm)                  | 85.6                         | (13.1) | 95.1                         | (15.6) |
| Sleep duration, h                         | 7.1                          | (1.0)  | 6.2                          | (1.2)  |
| Total MET-h/wk of physical activity       | 49.6                         | (28.8) | 45.5                         | (28.5) |
| Caffeine consumption (mg/d) <sup>a</sup>  | 27.5                         | (38.3) | 32.0                         | (38.6) |
| Fiber consumption (g) <sup>a</sup>        | 16.4                         | (8.5)  | 14.3                         | (7.5)  |
| Fat consumption (g) <sup>a</sup>          | 66.2                         | (30.4) | 73.2                         | (36.9) |
| Total energy intake (kcal/d) <sup>a</sup> | 1586                         | (619)  | 1706                         | (738)  |
| Glycemic load <sup>a</sup>                | 83.2                         | (39.2) | 95.2                         | (46.4) |
| Health Eating Index-2015 <sup>a</sup>     | 71.3                         | (8.2)  | 64.9                         | (9.1)  |
| <b>Percent (%)</b>                        |                              |        |                              |        |
| Race/ethnicity                            |                              |        |                              |        |
| Non-Hispanic White                        | 73.3                         |        | 54.6                         |        |
| Non-Hispanic Black                        | 21.2                         |        | 33.7                         |        |
| Hispanic                                  | 3.8                          |        | 9.1                          |        |
| Other                                     | 1.7                          |        | 2.6                          |        |
| Residential location                      |                              |        |                              |        |
| Urban                                     | 17.6                         |        | 19.8                         |        |
| Suburban or Small town                    | 62.2                         |        | 55.0                         |        |
| Rural                                     | 20.2                         |        | 25.2                         |        |
| Marital status                            |                              |        |                              |        |
| Never married                             | 7.0                          |        | 9.7                          |        |
| Married, living as married                | 76.2                         |        | 57.9                         |        |
| Separated, divorced, widowed              | 16.9                         |        | 32.5                         |        |
| Educational attainment                    |                              |        |                              |        |
| High school degree or less                | 10.6                         |        | 28.7                         |        |
| Some college                              | 37.6                         |        | 47.0                         |        |
| College degree or higher                  | 51.7                         |        | 24.3                         |        |
| Income                                    |                              |        |                              |        |
| < \$49,999                                | 13.1                         |        | 47.7                         |        |
| \$50,000-\$99,999                         | 42.2                         |        | 39.0                         |        |
| ≥ \$100,000                               | 41.0                         |        | 10.2                         |        |
| Missing                                   | 3.8                          |        | 3.1                          |        |
| No. family members aged <18 y             |                              |        |                              |        |
| None                                      | 54.1                         |        | 45.2                         |        |
| 1                                         | 14.8                         |        | 16.0                         |        |
| 2                                         | 10.8                         |        | 9.6                          |        |
| ≥3                                        | 3.7                          |        | 4.4                          |        |

|                                                 |      |      |
|-------------------------------------------------|------|------|
| Missing                                         | 16.7 | 24.9 |
| No. family members aged $\geq 65$ y             |      |      |
| None                                            | 68.5 | 62.9 |
| 1                                               | 8.8  | 6.9  |
| $\geq 2$                                        | 6.1  | 5.4  |
| Missing                                         | 16.7 | 24.9 |
| Alcohol consumption                             |      |      |
| Never                                           | 2.5  | 3.7  |
| Former                                          | 13.0 | 21.1 |
| Current consumption, $\leq 1$ drink/d           | 73.4 | 66.8 |
| Current consumption, $> 1$ drink/d              | 11.0 | 8.4  |
| Smoking status                                  |      |      |
| Never                                           | 50.7 | 45.2 |
| Former                                          | 38.2 | 32.2 |
| Current                                         | 11.1 | 22.6 |
| Leisure time physical activity (MET hours/week) |      |      |
| $< 7.5$                                         | 48.1 | 67.3 |
| 7.5-21                                          | 31.9 | 22.8 |
| $\geq 21$                                       | 20.0 | 9.9  |
| Night time snacking (yes)                       | 10.5 | 26.8 |
| Menopause (yes)                                 | 57.1 | 59.8 |
| Perceived stress in highest quartile            | 16.2 | 46.4 |
| Depression (yes)                                | 17.3 | 27.6 |
| Sleep duration, h                               |      |      |
| $< 7$ h                                         | 28.4 | 63.8 |
| 7-9 h                                           | 70.3 | 35.6 |
| $> 9$ h                                         | 1.3  | 0.6  |
| When awakened at night, turns on light?         |      |      |
| Never wakes up or does not turn on the light    | 87.2 | 82.2 |
| Turns on light/ Light already on                | 12.8 | 17.8 |
| Wake-up pattern past 6 weeks                    |      |      |
| Same every day                                  | 67.1 | 59.9 |
| Same on workdays /Different on days off         | 24.7 | 20.9 |
| Different but consistent                        | 3.4  | 4.0  |
| No consistent time                              | 4.9  | 15.2 |
| Bedtime pattern past 6 weeks                    |      |      |
| Same every day                                  | 60.9 | 43.6 |
| Same on workdays /Different on days off         | 20.7 | 18.1 |
| Different but consistent                        | 7.1  | 8.3  |
| No consistent time                              | 11.4 | 30.0 |
| Time it takes to fall asleep                    |      |      |
| $< 15$ min                                      | 44.5 | 12.7 |
| 15 - 30 min                                     | 41.5 | 35.2 |
| 30 min - 1 hour                                 | 11.2 | 25.9 |

|                                         |      |  |      |  |
|-----------------------------------------|------|--|------|--|
| > 1 hour                                | 2.9  |  | 26.2 |  |
| Frequency of waking up at night         |      |  |      |  |
| < 1 day a month                         | 3.0  |  | 3.1  |  |
| 1-3 days a month                        | 59.4 |  | 42.1 |  |
| ≥ once a week                           | 26.2 |  | 31.9 |  |
| Most or every night                     | 11.4 |  | 22.9 |  |
| Frequency of napping                    |      |  |      |  |
| Never                                   | 35.2 |  | 28.5 |  |
| < 1 day a month                         | 21.2 |  | 16.9 |  |
| 1-3 days a month                        | 20.2 |  | 19.9 |  |
| ≥ once a week                           | 19.1 |  | 27.7 |  |
| Most or every day                       | 4.3  |  | 7.0  |  |
| Sleep medication use in prior six weeks |      |  |      |  |
| Yes                                     | 19.3 |  | 27.3 |  |

Abbreviations: BMI, body mass index; MET, metabolic equivalent.

Data are presented as mean (standard deviation), or percentage.

<sup>a</sup> Calculated after excluding women who reported implausibly extreme energy intakes (<500 and >5000 kcals/d).

**eTable 10.** Association Between ALAN Exposure While Sleeping, Subsequent Weight Gain, and Incident Obesity Including Adjustment for Categories (Clusters) of Women With Television in Room

|                                                       |                             | Exposure to artificial light at night while sleeping |                                     |                               |                                        |                                                     |                         | P trend |
|-------------------------------------------------------|-----------------------------|------------------------------------------------------|-------------------------------------|-------------------------------|----------------------------------------|-----------------------------------------------------|-------------------------|---------|
|                                                       |                             | No ALAN exposure (n=7,807)                           | Small nightlight in room (n=17,320) | Light outside room (n=13,471) | Television in room cluster 1 (n=1,667) | Television in room cluster 2 <sup>d</sup> (n=1,368) | Light in room (n=1,694) |         |
| Weight gain of 5 kg or more                           | MV-adjusted RR <sup>c</sup> | 1                                                    | 1.01 (0.94, 1.07)                   | 1.03 (0.96, 1.10)             | 1.21 (1.08, 1.36)                      | 1.09 (0.96, 1.24)                                   | 1.19 (1.07, 1.33)       | <0.001  |
| BMI percent increase of 10% or more                   | MV-adjusted RR <sup>c</sup> | 1                                                    | 1.04 (0.96, 1.12)                   | 1.04 (0.96, 1.13)             | 1.19 (1.03, 1.38)                      | 1.03 (0.87, 1.21)                                   | 1.17 (1.01, 1.34)       | 0.03    |
| Overweight (BMI ≥ 25 kg/m <sup>2</sup> ) <sup>a</sup> | MV-adjusted RR <sup>c</sup> | 1                                                    | 1.11 (1.00, 1.22)                   | 1.08 (0.97, 1.20)             | 1.18 (0.97, 1.43)                      | 1.24 (0.96, 1.62)                                   | 1.25 (1.04, 1.51)       | 0.02    |
| Obesity (BMI ≥ 30 kg/m <sup>2</sup> ) <sup>b</sup>    | MV-adjusted RR <sup>c</sup> | 1                                                    | 1.15 (1.01, 1.30)                   | 1.20 (1.05, 1.37)             | 1.29 (1.02, 1.62)                      | 1.52 (1.17, 1.97)                                   | 1.27 (1.01, 1.59)       | <0.001  |

Abbreviations: BMI, body mass index. Data are presented as relative risk (95% 95% confidence interval).

<sup>a</sup> among women with a BMI < 25 kg/m<sup>2</sup> at baseline (n=17,179)

<sup>b</sup> among women with a BMI < 30 kg/m<sup>2</sup> at baseline (n=31,188)

<sup>c</sup> Adjusted for age at baseline, log of follow-up time, race/ethnicity (non-Hispanic white, non-Hispanic black, Hispanic, others), residential location (urban, suburban or small town, rural), educational attainment (high school degree or less, some college, college degree or higher), household income (<\$49,999, \$50,000-\$99,999, \$100,000+, missing), number of family members <18 years living in household (none, 1, 2, ≥3, missing), and number of family members ≥65 years living in household (none, 1, ≥2, missing), marital status (never married, married, other), smoking status (never smoker, current smoker, former smoker), alcohol consumption (never, former, current drinker ≤ 1 drink/day, current drinker > 1 drink/day), caffeine consumption (quintiles), menopausal status, depression, and perceived stress (quartile).

<sup>d</sup> Women within cluster 2 are more likely to be nonwhite, had lower levels of physical activity and poorer diet quality, lower educational attainment and household income, higher stress and depression, and worse sleep characteristics than those within cluster 1.

**eTable 11.** Association Between ALAN Exposure While Sleeping, Subsequent Weight Gain and Incident Obesity, After Excluding Women Who Responded “Yes” to Waking Up for Any Reason Every Night or Most Nights (n = 26 849)

|                                                       |                                        | Exposure to artificial light at night while sleeping |                          |                    |                          |         |                           |                             |
|-------------------------------------------------------|----------------------------------------|------------------------------------------------------|--------------------------|--------------------|--------------------------|---------|---------------------------|-----------------------------|
|                                                       |                                        | No ALAN exposure                                     | Small nightlight in room | Light outside room | Light/television in room | P trend | No ALAN exposure (n=2980) | Any ALAN exposure (n=11959) |
| Weight gain of 5 kg or more                           | No. of events                          | 457                                                  | 1007                     | 755                | 354                      |         | 457                       | 2116                        |
|                                                       | Cumulative incidence                   | 15.3                                                 | 16.8                     | 17.1               | 22.9                     |         | 15.3                      | 17.7                        |
|                                                       | Multivariable-adjusted RR <sup>c</sup> | 1                                                    | 1.06 (0.96, 1.17)        | 1.06 (0.95, 1.18)  | 1.27 (1.12, 1.45)        | 0.002   | 1                         | 1.09 (0.99, 1.19)           |
| BMI percent increase of 10% or more                   | No. of events                          | 317                                                  | 730                      | 522                | 258                      |         | 457                       | 2116                        |
|                                                       | Cumulative incidence                   | 10.7                                                 | 12.2                     | 11.9               | 16.8                     |         | 15.3                      | 17.7                        |
|                                                       | Multivariable-adjusted RR <sup>c</sup> | 1                                                    | 1.11 (0.98, 1.26)        | 1.06 (0.93, 1.21)  | 1.37 (1.18, 1.61)        | 0.003   | 1                         | 1.13 (1.01, 1.27)           |
| Overweight (BMI ≥ 25 kg/m <sup>2</sup> ) <sup>a</sup> | No. of events                          | 202                                                  | 451                      | 309                | 101                      |         | 202                       | 861                         |
|                                                       | Cumulative incidence                   | 14.3                                                 | 17.2                     | 17.5               | 20.9                     |         | 14.3                      | 17.7                        |
|                                                       | Multivariable-adjusted RR <sup>c</sup> | 1                                                    | 1.20 (1.03, 1.40)        | 1.19 (1.01, 1.41)  | 1.25 (1.00, 1.56)        | 0.03    | 1                         | 1.20 (1.05, 1.39)           |
| Obesity (BMI ≥ 30 kg/m <sup>2</sup> ) <sup>b</sup>    | No. of events                          | 116                                                  | 316                      | 221                | 100                      |         | 116                       | 637                         |
|                                                       | Cumulative incidence                   | 5.0                                                  | 6.9                      | 6.8                | 10.1                     |         | 5.0                       | 7.2                         |
|                                                       | Multivariable-adjusted RR <sup>c</sup> | 1                                                    | 1.37 (1.12, 1.68)        | 1.32 (1.07, 1.64)  | 1.64 (1.25, 2.14)        | 0.001   | 1                         | 1.39 (1.15, 1.68)           |

Abbreviations: BMI, body mass index.

<sup>a</sup> among women with a BMI < 25 kg/m<sup>2</sup> at baseline (n=6,932).

<sup>b</sup> among women with a BMI < 30 kg/m<sup>2</sup> at baseline (n=12,442).

<sup>c</sup> Adjusted for age at baseline, log of follow-up time, race/ethnicity (non-Hispanic white, non-Hispanic black, Hispanic, others), residential location (urban, suburban or small town, rural), educational attainment (high school degree or less, some college, college degree or higher), household income (<\$49,999, \$50,000-\$99,999, \$100,000+, missing), number of family members <18 years living in household (none, 1, 2, ≥3, missing), and number of family members ≥65 years living in household (none, 1, ≥2, missing), marital status (never married, married, other), smoking status (never smoker, current smoker, former smoker), alcohol consumption (never, former, current drinker ≤ 1 drink/day, current drinker > 1 drink/day), caffeine consumption (quintiles), menopausal status, depression, and perceived stress (quartile).

**eTable 12.** Association Between ALAN Exposure While Sleeping, Subsequent Weight Gain, and Incident Obesity, After Excluding Women Who Reported Taking Naps

|                                                       |                                        | Exposure to artificial light at night while sleeping |                          |                    |                          |         |                           |                             |
|-------------------------------------------------------|----------------------------------------|------------------------------------------------------|--------------------------|--------------------|--------------------------|---------|---------------------------|-----------------------------|
|                                                       |                                        | No ALAN exposure                                     | Small nightlight in room | Light outside room | Light/television in room | P trend | No ALAN exposure (n=2980) | Any ALAN exposure (n=11959) |
| Weight gain of 5 kg or more                           | No. of events                          | 376                                                  | 802                      | 564                | 295                      |         | 376                       | 1661                        |
|                                                       | Cumulative incidence                   | 14.3                                                 | 14.9                     | 15.2               | 22.7                     |         | 14.3                      | 16.0                        |
|                                                       | Multivariable-adjusted RR <sup>c</sup> | 1                                                    | 1.05 (0.94, 1.17)        | 1.02 (0.90, 1.15)  | 1.34 (1.17, 1.54)        | 0.002   | 1                         | 1.08 (0.97, 1.19)           |
| BMI percent increase of 10% or more                   | No. of events                          | 273                                                  | 597                      | 394                | 206                      |         | 273                       | 1197                        |
|                                                       | Cumulative incidence                   | 10.5                                                 | 11.2                     | 10.7               | 15.9                     |         | 10.5                      | 12.6                        |
|                                                       | Multivariable-adjusted RR <sup>c</sup> | 1                                                    | 1.07 (0.94, 1.22)        | 0.97 (0.84, 1.12)  | 1.31 (1.10, 1.55)        | 0.09    | 1                         | 1.07 (0.94, 1.21)           |
| Overweight (BMI ≥ 25 kg/m <sup>2</sup> ) <sup>a</sup> | No. of events                          | 186                                                  | 370                      | 239                | 102                      |         | 186                       | 711                         |
|                                                       | Cumulative incidence                   | 14.9                                                 | 14.5                     | 15.1               | 21.8                     |         | 14.9                      | 15.4                        |
|                                                       | Multivariable-adjusted RR <sup>c</sup> | 1                                                    | 0.97 (0.83, 1.14)        | 0.97 (0.82, 1.16)  | 1.22 (0.98, 1.52)        | 0.26    | 1                         | 1.00 (0.86, 1.16)           |
| Obesity (BMI ≥ 30 kg/m <sup>2</sup> ) <sup>b</sup>    | No. of events                          | 100                                                  | 255                      | 189                | 80                       |         | 100                       | 524                         |
|                                                       | Cumulative incidence                   | 4.8                                                  | 6.0                      | 6.8                | 9.3                      |         | 4.8                       | 6.7                         |
|                                                       | Multivariable-adjusted RR <sup>c</sup> | 1                                                    | 1.26 (1.01, 1.58)        | 1.35 (1.07, 1.70)  | 1.54 (1.15, 2.06)        | 0.003   | 1                         | 1.33 (1.08, 1.63)           |

Abbreviations: BMI, body mass index.

<sup>a</sup> among women with a BMI < 25 kg/m<sup>2</sup> at baseline (n=6,365).

<sup>b</sup> among women with a BMI < 30 kg/m<sup>2</sup> at baseline (n=11,009).

<sup>c</sup> Adjusted for age at baseline, log of follow-up time, race/ethnicity (non-Hispanic white, non-Hispanic black, Hispanic, others), residential location (urban, suburban or small town, rural), educational attainment (high school degree or less, some college, college degree or higher), household income (<\$49,999, \$50,000-\$99,999, \$100,000+, missing), number of family members <18 years living in household (none, 1, 2, ≥3, missing), and number of family members ≥65 years living in household (none, 1, ≥2, missing), marital status (never married, married, other), smoking status (never smoker, current smoker, former smoker), alcohol consumption (never, former, current drinker ≤ 1 drink/day, current drinker > 1 drink/day), caffeine consumption (quintiles), menopausal status, depression, and perceived stress (quartile).

**eTable 13.** Association Between ALAN Exposure While Sleeping, Subsequent Weight Gain, And Incident Obesity With Inverse Probability Weighting to Account for Loss to Follow-up<sup>d</sup>

|                                                       |                                        | Exposure to artificial light at night while sleeping |                          |                    |                          | P trend |
|-------------------------------------------------------|----------------------------------------|------------------------------------------------------|--------------------------|--------------------|--------------------------|---------|
|                                                       |                                        | No ALAN exposure                                     | Small nightlight in room | Light outside room | Light/television in room |         |
| Weight gain of 5 kg or more                           | Multivariable-adjusted RR <sup>c</sup> | 1                                                    | 1.01 (0.94, 1.08)        | 1.03 (0.96, 1.11)  | 1.17 (1.07, 1.28)        | <0.001  |
| BMI percent increase of 10% or more                   | Multivariable-adjusted RR <sup>c</sup> | 1                                                    | 1.04 (0.95, 1.13)        | 1.04 (0.95, 1.14)  | 1.13 (1.01, 1.27)        | 0.03    |
| Overweight (BMI ≥ 25 kg/m <sup>2</sup> ) <sup>a</sup> | Multivariable-adjusted RR <sup>c</sup> | 1                                                    | 1.11 (0.99, 1.23)        | 1.08 (0.96, 1.21)  | 1.22 (1.04, 1.42)        | 0.03    |
| Obesity (BMI ≥ 30 kg/m <sup>2</sup> ) <sup>b</sup>    | Multivariable-adjusted RR <sup>c</sup> | 1                                                    | 1.15 (1.01, 1.31)        | 1.20 (1.04, 1.37)  | 1.33 (1.12, 1.58)        | <0.001  |

Abbreviations: BMI, body mass index. Data are presented as relative risk (95% confidence interval).

<sup>a</sup> among women with a BMI < 25 kg/m<sup>2</sup> at baseline (n=17,179).

<sup>b</sup> among women with a BMI < 30 kg/m<sup>2</sup> at baseline (n=31,188).

<sup>c</sup> Adjusted for age at baseline, log of follow-up time, race/ethnicity (non-Hispanic white, non-Hispanic black, Hispanic, others), residential location (urban, suburban or small town, rural), educational attainment (high school degree or less, some college, college degree or higher), household income (<\$49,999, \$50,000-\$99,999, \$100,000+, missing), number of family members <18 years (none, 1, 2, ≥3, missing), and number of family members ≥65 years (none, 1, ≥2, missing), marital status (never married, married, other), smoking status (never smoker, current smoker, former smoker), alcohol consumption (never, former, current drinker ≤ 1 drink/day, current drinker > 1 drink/day), caffeine consumption (quintiles), menopausal status, depression, and perceived stress (quartile).

<sup>d</sup> Adjusted for age at baseline, log of follow-up time, race/ethnicity (non-Hispanic white, non-Hispanic black, Hispanic, others), residential location (urban, suburban or small town, rural), educational attainment (high school degree or less, some college, college degree or higher), household income (<\$49,999, \$50,000-\$99,999, \$100,000+, missing), number of family members <18 years living in household (none, 1, 2, ≥3, missing), and number of family members ≥65 years living in household (none, 1, ≥2, missing), marital status (never married, married, other), smoking status (never smoker, current smoker, former smoker), alcohol consumption (never, former, current drinker ≤ 1 drink/day, current drinker > 1 drink/day), caffeine consumption (quintiles), menopausal status, depression, and perceived stress (quartile), sleep duration (<7, 7-9, >9), turns on light when awakened at night (yes/no), bedtime pattern (same every day, same on workdays /different on days off, different but consistent, no consistent time), number of wake-ups (< 1 day a month, 1-3 days a month, ≥ once a week, most or every night), time it takes to fall asleep (< 15 min, 15-30 min, 30 min-1 hour, > 1 hour), frequency of napping (never, < 1 day a month, 1-3 days a month, ≥ once a week, most or every day), sleep medication use, total physical activity (MET-h/wk, quintiles), leisure time physical activity (insufficient, moderate, high), total energy intake, fat consumption (quintiles), fiber consumption (quintiles), glycemic load (quintiles), and night time snacking (yes, no).

**eTable 14.** Association Between ALAN Exposure While Sleeping, Subsequent Weight Gain, And Incident Obesity in Analysis Limited to 1 Randomly Selected Woman per Sibship (n = 39 188)

|                                                       |                                        | Exposure to artificial light at night while sleeping |                          |                    |                          |         |                  |                   |
|-------------------------------------------------------|----------------------------------------|------------------------------------------------------|--------------------------|--------------------|--------------------------|---------|------------------|-------------------|
|                                                       |                                        | No ALAN exposure                                     | Small nightlight in room | Light outside room | Light/television in room | P trend | No ALAN exposure | Any ALAN exposure |
| Weight gain of 5 kg or more                           | Multivariable-adjusted RR <sup>c</sup> | 1                                                    | 1.01 (0.94, 1.08)        | 1.02 (0.95, 1.10)  | 1.17 (1.08, 1.27)        | 0.002   | 1                | 1.04 (0.98, 1.11) |
| BMI percent increase of 10% or more                   | Multivariable-adjusted RR <sup>c</sup> | 1                                                    | 1.03 (0.95, 1.12)        | 1.04 (0.95, 1.13)  | 1.11 (0.99, 1.24)        | 0.10    | 1                | 1.05 (0.97, 1.13) |
| Overweight (BMI ≥ 25 kg/m <sup>2</sup> ) <sup>a</sup> | Multivariable-adjusted RR <sup>c</sup> | 1                                                    | 1.10 (0.99, 1.22)        | 1.06 (0.95, 1.19)  | 1.21 (1.05, 1.40)        | 0.06    | 1                | 1.10 (1.00, 1.21) |
| Obesity (BMI ≥ 30 kg/m <sup>2</sup> ) <sup>b</sup>    | Multivariable-adjusted RR <sup>c</sup> | 1                                                    | 1.11 (0.98, 1.27)        | 1.17 (1.01, 1.34)  | 1.27 (1.07, 1.51)        | 0.005   | 1                | 1.15 (1.02, 1.31) |

Abbreviations: BMI, body mass index. Data are presented as relative risk (95% confidence interval).

<sup>a</sup> among women with a BMI < 25 kg/m<sup>2</sup> at baseline (n=15,339).

<sup>b</sup> among women with a BMI < 30 kg/m<sup>2</sup> at baseline (n=27,905).

<sup>c</sup> Adjusted for age at baseline, log of follow-up time, race/ethnicity (non-Hispanic white, non-Hispanic black, Hispanic, others), residential location (urban, suburban or small town, rural), educational attainment (high school degree or less, some college, college degree or higher), household income (<\$49,999, \$50,000-\$99,999, \$100,000+, missing), number of family members <18 years living in household (none, 1, 2, ≥3, missing), and number of family members ≥65 years living in household (none, 1, ≥2, missing), marital status (never married, married, other), smoking status (never smoker, current smoker, former smoker), alcohol consumption (never, former, current drinker ≤ 1 drink/day, current drinker > 1 drink/day), caffeine consumption (quintiles), menopausal status, depression, and perceived stress (quartile).



**eTable 15.** Association Between ALAN Exposure While Sleeping and Sleep Hours

|                                                         | Exposure to artificial light at night while sleeping compared to no ALAN exposure |                             |                             |         |
|---------------------------------------------------------|-----------------------------------------------------------------------------------|-----------------------------|-----------------------------|---------|
|                                                         | Small nightlight in room                                                          | Light outside room          | Light/television in room    | P trend |
| Age-adjusted $\beta$ coefficient                        | 0.01 (-0.02, 0.04)                                                                | <b>-0.04 (-0.07, -0.01)</b> | <b>-0.42 (-0.46, -0.38)</b> | <0.001  |
| Multivariable-adjusted $\beta$ coefficient <sup>a</sup> | -0.02 (-0.04, 0.01)                                                               | <b>-0.04 (-0.07, -0.01)</b> | <b>-0.26 (-0.30, -0.22)</b> | <0.001  |
| Multivariable-adjusted $\beta$ coefficient <sup>b</sup> | -0.02 (-0.05, 0.004)                                                              | <b>-0.04 (-0.07, -0.01)</b> | <b>-0.17 (-0.21, -0.13)</b> | <0.001  |
| Multivariable-adjusted $\beta$ coefficient <sup>c</sup> | -0.03 (-0.05, 0.001)                                                              | <b>-0.04 (-0.07, -0.01)</b> | <b>-0.17 (-0.21, -0.13)</b> | <0.001  |

Data are presented as beta-coefficient (95% confidence interval).

<sup>a</sup> Adjusted for age at baseline, log of follow-up time, race/ethnicity (non-Hispanic white, non-Hispanic black, Hispanic, others), residential location (urban, suburban or small town, rural), educational attainment (high school degree or less, some college, college degree or higher), household income (<\$49,999, \$50,000-\$99,999, \$100,000+, missing), number of family members <18 years living in household (none, 1, 2,  $\geq$ 3, missing), and number of family members  $\geq$ 65 years living in household (none, 1,  $\geq$ 2, missing), marital status (never married, married, other), smoking status (never smoker, current smoker, former smoker), alcohol consumption (never, former, current drinker  $\leq$  1 drink/day, current drinker > 1 drink/day), caffeine consumption (quintiles), menopausal status, depression, and perceived stress (quartile).

<sup>b</sup> Additionally adjusted for turns on light when awakened at night (yes/no), bedtime pattern (same every day, same on workdays /different on days off, different but consistent, no consistent time), number of wake-ups (< 1 day a month, 1-3 days a month,  $\geq$  once a week, most or every night), time it takes to fall asleep (< 15 min, 15-30 min, 30 min-1 hour, > 1 hour), frequency of napping (never, < 1 day a month, 1-3 days a month,  $\geq$  once a week, most or every day), and sleep medication use.

<sup>c</sup> Additionally adjusted for total physical activity (MET-h/wk, quintiles), leisure time physical activity (insufficient, moderate, high), total energy intake, fat consumption (quintiles), fiber consumption (quintiles), glycemic load (quintiles), and night time snacking (yes, no).

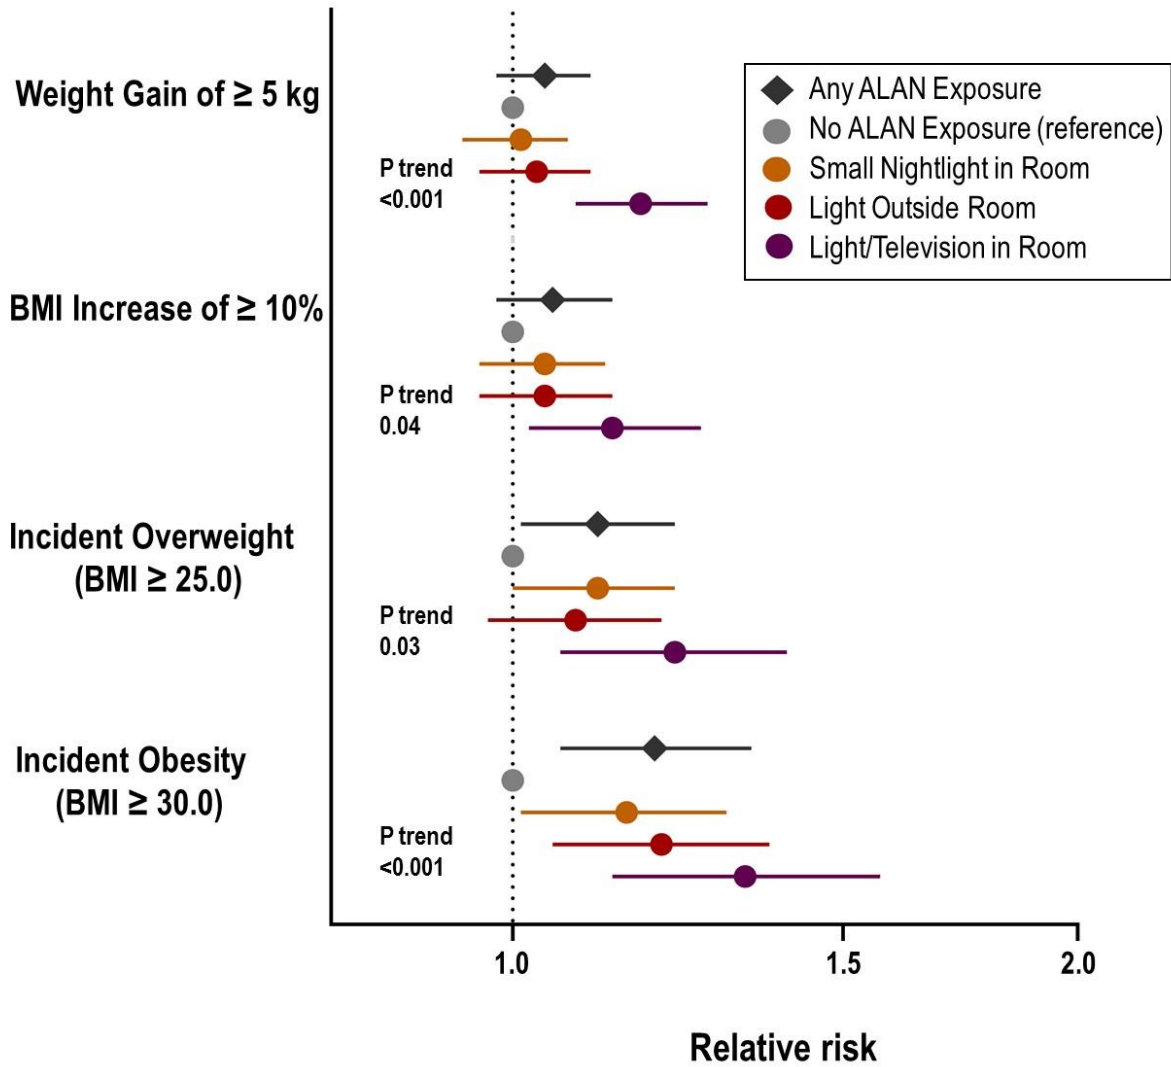

**eFigure.** Association Between ALAN Exposure While Sleeping, Subsequent Weight Gain, and Incident Obesity
